# Supplementary material for: The prognostic value of preoperative serum CA724 for CEA-normal colorectal cancer patients
Source: PeerJ. 2020 Apr 14;8:e8936. doi: 10.7717/peerj.8936 (PMC7164426; doi:10.7717/peerj.8936)
Supplement: Supplemental Information 1 [file peerj-08-8936-s001.xlsx]

## Sheet: Sheet1
Gender (Male=1 Female=2）	Age (Year) (≤65=1, >65=2)	TNM stage（sage I=1，stage II=2，stage III=3，stage IV=4)	CEA value (0.00-5.00ng/ml）	CEA levels（normal=1, high=2）	CA199 value (0.00-37.00U/ml）	CA199 levels（normal=1, high=2）	CA724 value (0.00-5.70U/ml）	CA724 levels（normal=1, high=2）	CA242 value (0.00-20.00U/ml）	CA242 levels（normal=1, high=2）	CA125 value (0.00-35.00U/ml	CA125 levels（normal=1, high=2）	Tumor location (Left=1 Right=2)	Perineural/Vascular invasion (Yes=1，No=0)	Pathological type（Protrude type=1，Infiltrating type=2，Ulcerative type=3)	Differentiation (Poor=1 Medium/High=2)	pT stage（T1-2=1，T3-4=2）	pN stage (N0=0 N1=1 N2=2)	Metastasis（No=0，Yes=1）	Postoperative chemoradiotherapy（No=0，Yes=1）	Cancer-special Survival（No=0 Yes=1）	Disease-free survival（No=0 Yes=1）	Censored survival time(m)	Disease-free survival time（m）
2	2	2	3.95	1	8	1	7.79	2	1.89	1	11.09	1	1	0	2	2	1	0	0	1	1	1	58	58
1	2	2	3.92	1	7.19	1	0.65	1	0.56	1	5.9	1	1	0	3	2	2	0	0	1	1	1	58	58
1	2	2	3.45	1	12.6	1	2.23	1	5	1	11.88	1	1	0	3	2	2	0	0	0	0	0	48	27
2	1	3	0.77	1	42.67	2	19.06	2	13.3	1	14.24	1	1	1	3	1	2	2	0	1	0	0	58	58
1	2	2	1.57	1	6.2	1	0.71	1	2	1	3.17	1	1	0	3	2	2	0	0	1	1	1	58	58
2	2	3	0.69	1	12.29	1	3.23	1	9.4	1	6.6	1	2	0	3	2	2	1	0	1	0	0	33	27
1	2	1	1.96	1	14.59	1	1	1	6.7	1	37.91	2	1	0	2	2	1	0	0	1	1	1	58	58
1	1	2	4.35	1	16.53	1	0.72	1	9.7	1	33.74	1	1	0	3	1	2	0	0	0	1	1	58	58
2	1	2	2.42	1	10.19	1	1.38	1	4.2	1	4.87	1	1	1	2	2	2	0	0	1	1	1	59	59
1	1	2	3.26	1	0.6	1	1.87	1	0	1	8.97	1	1	1	3	2	2	0	0	1	1	1	59	59
2	2	3	4.64	1	1.31	1	1.23	1	0.3	1	53.43	2	1	1	3	2	2	1	0	0	1	1	59	59
1	2	3	3.93	1	5.31	1	2.41	1	0.2	1	14.25	1	1	0	1	2	2	1	0	1	1	1	59	59
1	2	2	2.42	1	7.87	1	1.58	1	7.4	1	16.74	1	2	0	3	2	2	0	0	0	0	0	12	12
2	2	3	3.03	1	11.76	1	1.76	1	8.2	1	17.7	1	1	1	3	2	2	1	0	1	1	1	59	59
1	2	1	4.9	1	39.24	2	1.12	1	38.3	2	30.68	1	1	0	3	2	1	0	0	0	1	1	60	60
1	1	2	2.51	1	6.5	1	1.9	1	1.9	1	8.97	1	1	0	3	2	2	0	0	1	1	1	60	60
2	2	1	1.35	1	7.59	1	1.57	1	8.1	1	5.83	1	1	0	1	2	1	0	0	0	1	1	60	60
2	2	1	1.02	1	5.82	1	4.72	1	0	1	22.7	1	2	0	3	2	1	0	0	0	1	1	60	60
2	2	1	0.9	1	1.05	1	1.01	1	0	1	5.94	1	1	0	1	2	1	0	0	0	1	1	61	61
1	1	3	3.49	1	25.39	1	6.6	2	4.4	1	5.22	1	1	0	3	2	1	1	0	1	1	1	60	60
2	1	1	0.51	1	5.5	1	0.57	1	3.3	1	33.5	1	1	0	3	2	1	0	0	0	1	1	60	60
1	1	2	3.2	1	18.36	1	0.87	1	31.9	2	7.2	1	1	1	3	2	2	0	0	1	1	1	60	60
2	2	3	3.96	1	7.05	1	1.49	1	4.8	1	4.99	1	1	1	3	2	2	2	0	1	0	0	23	23
1	2	3	3.59	1	6.19	1	14.39	2	3.2	1	3.78	1	1	0	3	2	2	2	0	0	0	0	47	36
1	2	2	1.62	1	14.57	1	1.15	1	2.7	1	4.31	1	1	0	3	2	2	0	0	1	0	0	36	29
2	2	2	1.2	1	16.58	1	2.85	1	10.7	1	9.36	1	1	0	3	2	2	0	0	1	1	1	61	61
2	2	3	3.11	1	221.2	2	7.68	2	99.7	2	12.15	1	1	1	2	1	2	1	0	0	0	0	12	12
1	1	3	4.25	1	13.25	1	2.45	1	14.4	1	93.29	2	2	0	3	1	2	2	0	1	1	1	61	61
1	1	1	1.33	1	9.6	1	2.52	1	3.7	1	6.66	1	1	0	3	2	1	0	0	0	1	1	61	61
2	1	2	1.87	1	11.42	1	1.35	1	6.2	1	17.3	1	1	0	3	2	2	0	0	1	1	1	61	61
2	1	2	3.18	1	11.01	1	2.44	1	4.1	1	15.49	1	2	0	3	2	2	0	0	1	1	1	61	61
1	1	2	3.34	1	18.54	1	1.96	1	14.6	1	16.08	1	1	0	3	2	2	0	0	0	1	1	61	61
1	2	1	1.86	1	32.26	1	2.22	1	6.6	1	35.17	2	1	0	3	2	1	0	0	0	0	0	60	60
1	1	1	0.72	1	8.67	1	16.12	2	14	1	9.56	1	2	0	3	2	1	0	0	1	1	1	61	61
1	1	1	2.19	1	0.67	1	2.81	1	0	1	6.85	1	1	0	1	2	1	0	0	1	1	1	61	61
1	1	3	1.36	1	10.24	1	2.2	1	0	1	7.12	1	1	0	3	2	2	1	0	1	1	1	62	62
1	1	3	2.62	1	19.34	1	2.01	1	7.8	1	5.5	1	1	0	3	2	2	1	0	0	0	0	10	10
2	1	3	2.27	1	44.91	2	12.29	2	31.1	2	4.9	1	1	1	3	1	2	1	0	1	1	1	62	62
1	2	3	1.08	1	13.56	1	47.28	2	5.3	1	6.2	1	2	0	3	1	2	2	0	0	0	0	9	9
1	1	2	1.11	1	48.99	2	2.48	1	54	2	8.9	1	1	0	3	2	2	0	0	1	1	1	62	62
1	2	2	1.19	1	16.08	1	2.08	1	0	1	14.1	1	2	0	2	2	2	0	0	0	1	1	62	62
1	2	2	4.94	1	6.82	1	1.15	1	13.2	1	32.9	1	1	0	3	2	2	0	0	1	1	1	62	62
2	1	3	2.13	1	55.79	2	17.85	2	12.2	1	15	1	1	0	1	2	2	2	0	1	0	0	18	18
1	1	3	3.78	1	7.73	1	19.34	2	10.7	1	71.5	2	1	0	1	2	2	1	0	1	1	1	62	62
2	1	3	4.54	1	24.95	1	2.97	1	35.9	2	3.2	1	1	0	3	2	1	2	0	0	1	1	62	62
1	1	2	1.41	1	9.45	1	1.03	1	1.9	1	4.9	1	1	0	3	2	2	0	0	1	1	1	62	62
2	2	2	2.99	1	0.6	1	0	1	0	1	12.4	1	1	0	3	2	2	0	0	0	1	1	62	62
1	1	3	1.5	1	8.25	1	5.03	1	10.9	1	6.1	1	2	0	3	2	2	1	0	0	1	1	62	62
2	1	2	1	1	3.52	1	4.16	1	2.5	1	6.8	1	2	0	3	2	2	0	0	1	1	1	63	63
2	2	2	4.29	1	1.62	1	1.77	1	0	1	4.8	1	1	0	2	2	2	0	0	0	1	1	63	63
1	1	3	4.56	1	19.71	1	1.14	1	24.9	2	3	1	1	1	3	2	2	1	0	0	0	0	27	14
2	1	2	2.27	1	0.6	1	7.53	2	0	1	8.3	1	1	0	3	2	2	0	0	1	1	1	63	63
1	1	1	0.71	1	7.17	1	1.55	1	0	1	3.7	1	1	0	2	2	1	0	0	1	1	1	63	63
2	2	1	0.76	1	11.55	1	8.29	2	4.2	1	5.1	1	1	0	3	2	1	0	0	0	0	0	33	29
1	2	1	1.1	1	0.6	1	2.55	1	0	1	13.8	1	1	0	1	2	1	0	0	0	1	1	63	63
1	2	1	1.13	1	6.63	1	1.21	1	0	1	18.2	1	1	0	1	2	1	0	0	0	1	1	63	63
1	2	1	4.91	1	31.89	1	0.96	1	3.5	1	9.4	1	1	0	1	2	1	0	0	0	1	1	63	63
2	1	3	4.52	1	7	1	3.36	1	6.9	1	32.7	1	1	0	1	1	2	2	0	0	1	1	63	63
1	1	4	4.49	1	5.05	1	2.49	1	0	1	7.4	1	1	0	3	1	2	0	1	0	1	1	63	63
2	1	2	1.73	1	18.02	1	1.54	1	9.5	1	8.3	1	2	0	3	2	2	0	0	0	1	1	64	64
2	1	3	1.9	1	97.17	2	5.36	1	38.5	2	24.6	1	2	0	1	2	2	1	0	1	0	0	20	20
2	1	1	2.86	1	18.67	1	30.38	2	30.6	2	6.2	1	1	0	3	2	1	0	0	0	1	0	64	61
1	1	2	0.2	1	19.28	1	3.28	1	11.9	1	9.12	1	2	0	1	1	2	0	0	0	1	1	64	64
2	1	3	3.35	1	163	2	2.48	1	115	2	11.16	1	1	0	1	2	2	1	0	1	1	1	64	64
1	2	3	4.18	1	5.31	1	0	1	0	1	10.86	1	1	0	1	2	2	1	0	1	0	0	27	15
2	2	1	1.07	1	9.51	1	1.02	1	0.4	1	8.44	1	1	0	1	2	1	0	0	0	1	1	64	64
1	1	2	0.87	1	8.65	1	0.64	1	1.3	1	5.86	1	2	0	3	2	2	0	0	0	1	1	64	64
1	2	1	1.96	1	38.09	2	1.96	1	0	1	7.87	1	1	0	3	2	1	0	0	0	0	0	23	23
1	2	1	0.96	1	11.22	1	1.15	1	3	1	8	1	1	0	2	2	1	0	0	0	1	1	64	64
1	1	3	0.79	1	7.06	1	3.65	1	4.7	1	32.03	1	2	1	3	1	2	2	0	0	0	0	27	27
2	2	2	1.03	1	63.35	2	1.77	1	29.8	2	19.59	1	2	1	3	2	2	0	0	1	1	1	64	64
1	1	2	1.33	1	56.01	2	27.75	2	53.3	2	12.09	1	1	0	3	2	2	0	0	1	1	1	64	64
1	2	2	4.62	1	27.21	1	5.36	1	17.4	1	9.24	1	1	0	2	2	2	0	0	0	1	1	47	47
2	1	2	0.77	1	11.38	1	2.14	1	1.2	1	14.06	1	1	0	2	2	2	0	0	1	1	1	65	65
2	1	1	2.22	1	4.08	1	3.42	1	0	1	8.63	1	1	0	3	2	1	0	0	1	1	1	65	65
1	2	2	3.05	1	7.86	1	1.15	1	0.8	1	24.24	1	1	0	3	2	2	0	0	1	0	0	31	31
1	2	1	3.21	1	8.97	1	77.43	2	1.22	1	12.52	1	1	0	1	2	1	0	0	0	1	1	65	65
2	2	1	0.68	1	11.21	1	1.5	1	14.02	1	13.07	1	2	0	3	2	1	0	0	0	1	1	65	65
2	1	3	3.13	1	8.74	1	0.84	1	2.33	1	6.11	1	1	0	3	2	2	2	0	1	1	1	65	65
1	1	3	4.38	1	17.08	1	19.63	2	17.42	1	5.48	1	1	1	1	2	2	2	0	0	0	0	10	10
1	1	2	3.55	1	61.77	2	9.24	2	51.26	2	41.35	2	2	1	3	2	2	0	0	1	0	0	51	30
1	2	2	1.02	1	16.8	1	1.38	1	2.76	1	20.84	1	2	0	3	2	2	0	0	0	1	1	66	66
1	1	3	1.52	1	5.4	1	70.1	2	5.78	1	8.63	1	1	0	2	1	2	2	0	0	1	1	66	66
1	1	2	1.7	1	8.53	1	2.23	1	0.01	1	6.69	1	1	1	3	2	2	0	0	1	1	1	66	66
2	2	3	0.59	1	8.16	1	2.74	1	0.01	1	11.82	1	1	0	1	2	2	1	0	1	1	1	66	66
2	1	1	1.67	1	9.9	1	4.05	1	3.42	1	8.69	1	1	0	3	2	1	0	0	0	1	1	66	66
1	1	3	2.44	1	8.34	1	34.14	2	0.37	1	7.76	1	1	1	3	2	2	1	0	1	0	0	38	38
1	1	3	3.64	1	11.68	1	3.79	1	16.27	1	15.12	1	1	0	3	2	2	2	0	1	1	1	66	66
1	1	3	3.68	1	0.6	1	1.15	1	0.01	1	28.89	1	2	1	3	2	2	1	0	1	0	0	12	12
2	1	1	2.91	1	10.44	1	1.25	1	3.5	1	8.84	1	2	0	2	1	1	0	0	0	1	1	61	61
2	2	3	3.53	1	20.99	1	1.53	1	15.44	1	16.2	1	1	0	3	2	2	1	0	0	0	0	33	33
1	1	2	0.77	1	70.75	2	3.21	1	91.4	2	4.72	1	1	0	3	2	2	0	0	1	1	1	64	64
1	1	1	4.04	1	27.32	1	2.14	1	19.78	1	6.29	1	1	0	3	2	1	0	0	0	1	1	67	67
2	1	1	0.75	1	3.79	1	7.57	2	0.41	1	19.23	1	1	0	1	2	1	0	0	0	1	1	67	67
2	1	2	0.22	1	4.26	1	2.13	1	0.01	1	6.94	1	2	0	3	2	2	0	0	1	1	1	67	67
1	1	4	2.09	1	33.67	1	2.92	1	22	2	11.58	1	2	0	1	2	2	0	1	1	1	1	67	2
2	2	4	2.32	1	10.89	1	1.72	1	2.4	1	7.9	1	1	1	1	2	2	2	1	1	0	0	11	11
2	1	1	2.29	1	18.94	1	1.38	1	12	1	12.73	1	1	0	3	2	1	0	0	0	0	0	28	28
2	1	1	2.66	1	0.76	1	0.87	1	0	1	13.38	1	1	0	3	2	1	0	0	1	1	1	68	68
1	2	4	3.71	1	764.8	2	1.44	1	131	2	95.36	2	1	0	2	2	2	1	1	0	0	0	30	3
1	1	4	0.6	1	5.25	1	2.45	1	0.01	1	8.9	1	2	0	3	1	2	1	1	0	1	1	68	68
2	2	1	1.59	1	10.1	1	0.86	1	0.77	1	3.8	1	1	0	3	2	1	0	0	1	1	1	68	68
2	1	2	3.11	1	16.79	1	2.88	1	9.74	1	13.21	1	2	0	1	2	2	0	0	1	1	0	68	37
2	1	2	1.37	1	10.74	1	2.21	1	7.07	1	11.01	1	1	0	1	2	2	0	0	1	1	1	68	68
1	2	2	2.92	1	14.15	1	35.09	2	14.25	1	9.88	1	2	0	3	1	2	0	0	0	1	1	68	68
1	1	1	1.14	1	5.31	1	0.76	1	0.06	1	5.68	1	1	0	1	2	1	0	0	0	1	1	68	68
1	1	2	1.16	1	11.15	1	5.93	2	8.89	1	6.8	1	2	0	3	1	2	0	0	1	1	1	68	68
1	1	3	3.73	1	75.01	2	47.99	2	135.28	2	15.81	1	1	0	3	1	2	2	0	1	0	0	21	17
1	1	2	2.36	1	11.81	1	4.41	1	8.17	1	4.79	1	1	1	3	2	2	0	0	1	1	1	68	68
2	1	2	2.11	1	21.13	1	1.48	1	17.92	1	12.68	1	1	0	3	2	2	0	0	1	0	0	33	33
2	1	2	0.73	1	7.97	1	2.27	1	1.81	1	14.69	1	2	0	3	2	2	0	0	1	1	1	68	68
2	2	1	1.45	1	14.87	1	31.76	2	5.48	1	11.54	1	1	0	3	2	1	0	0	0	1	1	68	68
2	1	2	0.37	1	4.21	1	5.09	2	0.01	1	7.05	1	1	0	3	2	2	0	0	1	1	1	68	68
2	1	3	2.77	1	13.47	1	26.04	2	9.38	1	26.66	1	1	1	3	1	2	2	0	0	0	0	37	37
1	2	1	1.83	1	15.19	1	10.63	2	0.31	1	30.53	1	1	0	1	2	1	0	0	0	0	0	68	68
1	1	3	0.53	1	7.54	1	1.13	1	7.06	1	4	1	1	0	3	2	2	1	0	0	1	1	68	68
1	2	1	3.18	1	17.98	1	2.34	1	15.23	1	7	1	1	0	3	2	1	0	0	0	1	1	68	68
1	1	1	3.75	1	12.8	1	63.41	2	9.88	1	9.63	1	1	0	1	2	1	0	0	1	0	0	6	5
1	2	1	0.87	1	5.32	1	1.3	1	0.01	1	10.56	1	1	0	1	2	1	0	0	0	1	1	68	68
2	2	1	2.12	1	8.66	1	4.53	1	1.24	1	9.33	1	2	0	1	2	1	0	0	0	1	1	68	68
1	2	4	1.45	1	19.21	1	1.15	1	15.83	1	46.4	2	2	0	3	2	2	2	1	0	0	0	16	16
2	1	1	2.07	1	6.9	1	1.47	1	0.01	1	16.3	1	2	0	3	2	1	0	0	0	1	1	68	68
2	1	2	1.57	1	9.44	1	3.07	1	2.25	1	3.09	1	1	0	3	2	2	0	0	1	1	1	69	69
1	2	1	2	1	10.64	1	1.5	1	2.1	1	15.56	1	2	0	2	2	1	0	0	0	0	0	36	36
1	2	1	1.41	1	8.69	1	7.2	2	3.4	1	4.13	1	1	0	1	2	1	0	0	0	0	1	57	57
1	2	1	2.83	1	20.35	1	1.22	1	3.54	1	12.28	1	1	0	1	2	1	0	0	0	1	1	69	69
2	2	2	3.57	1	20.59	1	3.61	1	15.77	1	13	1	1	0	3	2	2	0	0	0	0	0	44	44
2	2	2	2.76	1	13.96	1	0.78	1	2.83	1	4.84	1	2	0	3	2	2	0	0	0	0	0	64	40
2	2	3	1.65	1	36.2	1	1.2	1	30.28	2	12.11	1	2	1	3	2	2	1	0	1	1	1	69	69
1	1	3	4.8	1	0.6	1	2.12	1	2.12	1	9.39	1	1	0	3	2	2	1	0	1	1	1	69	69
1	2	3	4.18	1	9.24	1	2.62	1	5.37	1	13.41	1	1	0	3	2	2	1	0	1	1	1	69	69
1	1	3	0.86	1	4.56	1	1.33	1	0.01	1	25.41	1	2	1	3	2	2	1	0	1	1	1	69	69
1	1	2	3.7	1	11.59	1	1.52	1	10.24	1	8.1	1	1	0	3	2	2	0	0	1	1	1	69	69
1	2	2	2.41	1	5.27	1	1.22	1	0.01	1	8.3	1	1	0	3	2	2	0	0	0	1	1	69	69
1	1	3	4	1	89.47	2	1.34	1	22.35	2	12.25	1	1	0	2	1	2	2	0	0	0	0	6	6
2	1	3	0.78	1	16.72	1	6.07	2	2.71	1	41.4	2	1	0	2	1	2	2	0	1	0	0	21	21
1	1	3	3.34	1	3.04	1	2.45	1	0.01	1	9.35	1	1	0	3	2	2	1	0	1	1	1	70	70
2	1	2	1.48	1	16.76	1	54.66	2	20.52	2	26.56	1	1	0	3	2	2	0	0	0	0	0	12	12
1	2	1	1.75	1	7.6	1	1.74	1	2.1	1	4.72	1	1	0	3	2	1	0	0	0	1	1	70	70
1	2	3	4.14	1	0.6	1	87.98	2	0.01	1	14.4	1	2	0	1	2	2	1	0	0	0	0	27	27
2	1	3	0.72	1	8.24	1	5.15	1	0.98	1	40.05	2	1	0	3	2	2	1	0	1	1	1	70	70
1	1	2	2.54	1	7.12	1	1.23	1	2.74	1	7.42	1	1	0	3	2	2	0	0	0	1	1	70	70
1	2	2	2.17	1	9.84	1	1.71	1	0.69	1	4.43	1	1	0	3	2	2	0	0	0	1	1	70	70
2	2	2	3.03	1	17.68	1	1.99	1	12.59	1	19.46	1	1	0	3	2	2	0	0	0	0	0	1	1
1	2	3	4.55	1	31.28	1	2.27	1	21.9	2	11.51	1	1	0	1	2	1	1	0	0	1	1	70	70
2	1	3	2.95	1	2.85	1	1.93	1	0.01	1	12.28	1	1	1	1	2	1	1	0	0	1	1	70	70
2	1	2	1.93	1	23.29	1	2.88	1	16.13	1	23.03	1	2	0	3	2	2	0	0	1	1	1	71	71
1	1	2	3.23	1	8.03	1	1.52	1	5.42	1	19.25	1	1	0	1	2	2	0	0	0	1	1	71	71
1	1	1	2.59	1	6.11	1	10.92	2	0.01	1	7.92	1	1	0	3	1	1	0	0	1	1	1	71	71
1	1	3	1.32	1	17.73	1	1.37	1	24.69	2	18.85	1	2	0	3	1	2	2	0	0	1	1	71	71
1	2	1	2.63	1	62.51	2	17.67	2	57	2	11.09	1	2	0	1	2	1	0	0	0	1	1	71	71
1	1	2	0.69	1	6	1	6.88	2	0.01	1	11.24	1	2	1	3	2	2	0	0	1	0	0	28	16
1	1	3	3.28	1	19.52	1	0	1	0	1	9.36	1	1	1	2	2	2	1	0	1	0	0	25	25
1	2	1	4.11	1	14.63	1	3.41	1	8.2	1	13.18	1	2	1	3	2	1	0	0	0	1	1	71	71
2	1	1	1.67	1	9.18	1	1.5	1	3.35	1	33.42	1	1	1	3	2	1	0	0	1	1	1	71	71
2	1	1	3.95	1	0.6	1	3.57	1	0.01	1	9.53	1	2	1	1	2	1	0	0	0	1	1	71	71
1	2	1	2.88	1	1.97	1	1.91	1	0.01	1	8.31	1	2	1	2	2	1	0	0	1	0	0	43	43
1	1	1	2.64	1	10.19	1	1.74	1	2.64	1	9.44	1	1	0	3	2	1	0	0	1	0	0	17	17
1	2	1	1.76	1	9.22	1	1.82	1	4.87	1	5.11	1	1	0	3	2	1	0	0	0	0	0	39	39
2	1	3	3.03	1	22.92	1	5.53	1	24.53	2	13.65	1	1	1	3	2	1	1	0	1	0	0	33	33
2	1	3	4.53	1	0.6	1	6.17	2	0.01	1	5.61	1	1	1	3	1	2	2	0	0	0	0	31	31
2	2	1	1.06	1	12.36	1	1.57	1	0.01	1	18.55	1	2	1	2	1	1	0	0	1	1	1	71	71
2	1	2	1.2	1	2.04	1	2.04	1	0.01	1	12.18	1	2	0	2	2	2	0	0	1	1	1	72	72
2	1	1	0.76	1	12.65	1	5.82	2	13.58	1	18.7	1	1	0	3	2	1	0	0	0	1	1	72	72
1	2	2	1.57	1	7.48	1	4.61	1	2.67	1	21.6	1	1	0	3	2	2	0	0	1	1	1	72	72
1	2	1	2.31	1	0.6	1	4.24	1	0.01	1	7.8	1	1	0	3	2	1	0	0	0	0	0	12	12
2	2	3	0.73	1	7.54	1	1.55	1	6.42	1	7.1	1	1	1	3	2	1	1	0	1	1	1	72	72
1	1	3	1.39	1	0.76	1	1.68	1	5.07	1	8.5	1	1	0	3	2	1	1	0	0	1	1	72	72
1	1	4	1.33	1	988.9	2	2.02	1	>157.50	2	21.4	1	2	0	3	2	2	2	1	1	0	0	30	30
2	1	3	2.4	1	5.65	1	2.31	1	2.08	1	10	1	1	0	3	2	1	1	0	1	1	1	72	72
2	1	1	0.58	1	7.9	1	2.08	1	9.56	1	13.1	1	1	0	3	2	1	0	0	0	1	1	72	72
1	2	2	1.29	1	6.88	1	1.84	1	4.07	1	37.4	2	2	0	3	2	2	0	0	1	1	1	72	72
2	1	3	1.34	1	13.46	1	7.56	2	8.08	1	9.4	1	1	0	3	2	1	2	0	0	1	1	73	73
1	1	3	1.73	1	7.46	1	1.63	1	3.46	1	6.6	1	1	0	3	2	1	1	0	1	1	1	73	73
1	2	1	3.04	1	9.57	1	1.66	1	6.54	1	9.5	1	1	0	1	2	1	0	0	1	1	1	73	73
1	1	3	3.47	1	15.74	1	1.51	1	8.71	1	4.6	1	1	0	1	2	1	1	0	0	1	0	73	46
1	2	1	0.62	1	10.13	1	2.13	1	1.54	1	9.9	1	1	0	2	2	1	0	0	0	1	1	73	73
1	1	2	3.98	1	11.42	1	7.83	2	5.66	1	1.2	1	1	0	3	2	2	0	0	1	1	1	60	60
2	1	2	1.35	1	16.6	1	2.83	1	11.84	1	7.7	1	1	0	3	2	2	0	0	1	1	1	73	73
1	1	1	4.29	1	7.62	1	1.54	1	1.45	1	5.9	1	1	0	3	2	1	0	0	1	1	1	73	73
1	2	2	1.89	1	6.25	1	5.52	1	2.77	1	5	1	1	0	3	2	2	0	0	1	1	1	73	73
1	2	3	1.26	1	34.68	1	1.6	1	22.63	2	5.03	1	2	0	3	1	2	1	0	0	1	1	70	70
1	2	2	2.62	1	10.88	1	1.31	1	15.02	1	14.6	1	1	0	3	2	2	0	0	1	1	1	73	73
2	1	3	1.15	1	7.2	1	1.09	1	4.55	1	13.4	1	1	0	3	2	2	1	0	1	0	0	18	18
1	2	2	0.81	1	12.89	1	3.02	1	0.01	1	6.8	1	1	0	1	2	2	0	0	0	1	1	73	73
2	2	2	4.17	1	8.89	1	0.95	1	4.7	1	14.9	1	2	0	3	2	2	0	0	1	0	0	32	32
1	2	2	2.42	1	39.86	2	3.44	1	4.84	1	29.54	1	1	0	3	2	2	0	0	0	1	1	73	73
1	2	2	4.5	1	2.74	1	4.58	1	0.01	1	14.64	1	2	0	1	2	2	0	0	0	0	0	25	25
1	1	3	2.5	1	82.75	2	40.07	2	82.04	2	37.48	2	2	0	3	2	2	2	0	1	0	0	23	23
1	1	3	3.07	1	12.44	1	14.65	2	16.39	1	6.91	1	1	1	3	1	2	2	0	1	0	0	25	25
2	1	2	3.07	1	0.6	1	1.08	1	0.01	1	11.3	1	1	0	3	2	2	0	0	1	1	1	73	73
1	2	1	4.15	1	10.98	1	1.68	1	3.75	1	12.3	1	1	0	2	2	1	0	0	0	0	0	50	42
2	1	3	1.96	1	31.73	1	11.05	2	6.74	1	52.5	2	1	1	3	2	2	2	0	0	0	0	20	20
1	1	3	1.13	1	3.02	1	1.14	1	0.01	1	11.3	1	1	0	3	2	2	1	0	1	1	1	74	74
1	2	1	1.55	1	17.45	1	2.2	1	7.1	1	6.6	1	1	0	3	2	1	0	0	0	1	1	74	74
1	2	1	3.86	1	9.24	1	87.59	2	0.01	1	19	1	1	1	2	2	1	0	0	0	1	1	74	74
2	2	1	0.84	1	0.6	1	2.16	1	0.01	1	14	1	1	0	3	2	1	0	0	0	1	1	74	74
1	2	2	1.91	1	7.96	1	1.52	1	1.27	1	218.7	2	2	0	3	2	2	0	0	0	1	1	74	74
1	1	2	3.27	1	10.08	1	1.15	1	11.45	1	7	1	1	0	3	2	2	0	0	0	1	1	74	74
1	2	2	3.94	1	18.05	1	1.53	1	15.71	1	17.7	1	1	0	3	2	2	0	0	1	1	1	74	74
1	1	2	2.61	1	7.53	1	1.15	1	4.61	1	4.7	1	1	0	2	2	2	0	0	1	1	1	74	74
1	1	3	2.79	1	10	1	1.38	1	9.64	1	10.5	1	1	1	3	2	2	1	0	1	1	1	74	74
1	2	2	1.15	1	0.6	1	1.1	1	0.01	1	19	1	2	0	1	2	2	0	0	0	1	1	74	74
1	1	3	1.67	1	4.69	1	0.86	1	0.01	1	5.9	1	1	0	3	2	2	1	0	1	1	1	74	74
1	2	2	3.63	1	6.1	1	2.37	1	0.46	1	8.72	1	1	0	3	2	2	0	0	0	1	1	74	74
2	2	2	3.03	1	9.44	1	0.95	1	4.72	1	10.88	1	1	0	2	2	2	0	0	1	1	1	74	74
1	2	2	1.67	1	10.13	1	3.16	1	0.01	1	10.88	1	1	0	3	2	2	0	0	1	0	0	72	72
1	1	2	3.98	1	0.6	1	1.32	1	0.01	1	13.7	1	1	0	3	2	2	0	0	1	0	0	32	26
2	1	3	2.88	1	24.52	1	1.41	1	29.5	2	20.74	1	1	1	3	2	2	1	0	1	1	1	75	75
2	1	3	3.3	1	38.16	2	0	1	0	1	29.54	1	1	0	2	1	2	1	0	1	0	0	28	17
1	1	3	2.23	1	6.44	1	2.41	1	5.19	1	12.09	1	1	0	3	2	2	1	0	1	0	0	33	25
2	2	3	2.8	1	28.62	1	5.09	1	10.2	1	7.27	1	1	0	3	2	2	2	0	0	0	0	20	20
1	1	3	2.61	1	42.49	2	4.02	1	59.06	2	10.79	1	1	0	2	2	2	1	0	1	1	1	73	73
1	2	3	2.14	1	10.96	1	1.62	1	2.77	1	15.2	1	1	0	3	2	2	1	0	1	0	0	74	74
1	1	1	2.77	1	16.05	1	5.04	1	16.17	1	13.73	1	1	0	3	2	1	0	0	0	1	1	75	75
1	2	1	3.06	1	5.5	1	3.61	1	1.8	1	12.18	1	1	0	3	2	1	0	0	0	1	1	75	75
1	2	3	1.77	1	14.87	1	9.82	2	5.65	1	13.23	1	1	0	3	2	2	1	0	1	0	0	27	27
1	1	2	1.87	1	44.26	2	7.78	2	59.59	2	9.94	1	2	0	1	2	2	0	0	1	1	1	75	75
1	1	3	4.25	1	18.52	1	4.06	1	4.67	1	10.79	1	1	0	3	2	2	1	0	1	1	1	75	75
1	2	2	4.9	1	22.87	1	4.04	1	24.37	2	19.88	1	2	1	2	1	2	0	0	1	0	0	12	12
2	1	2	3.7	1	8.68	1	4.11	1	4.35	1	28.33	1	2	0	3	2	2	0	0	1	1	1	75	75
1	1	1	3.67	1	16.91	1	6.97	2	4.31	1	4.78	1	1	0	1	2	1	0	0	0	1	1	75	75
1	2	2	1.19	1	9.8	1	5.52	1	0.01	1	18.21	1	1	0	3	2	2	0	0	1	1	1	75	75
1	2	2	1.79	1	16.02	1	3.51	1	14.42	1	8.01	1	1	0	3	2	2	0	0	1	0	0	28	28
2	1	4	3.59	1	10.68	1	1.43	1	3.02	1	6.93	1	1	0	3	2	2	0	1	1	0	0	26	26
2	1	4	1.66	1	22.36	1	0.69	1	56.21	2	15.2	1	2	0	3	2	2	2	1	1	0	0	30	30
1	2	2	4.06	1	12.53	1	4.04	1	0.01	1	9.21	1	1	0	3	2	2	0	0	1	1	1	76	76
2	2	2	2.52	1	5.7	1	1.51	1	0.01	1	4.94	1	1	0	3	2	2	0	0	0	1	1	76	76
1	1	3	4.08	1	57.05	2	1.87	1	0.01	1	24.72	1	1	0	3	2	2	1	0	1	1	1	76	76
2	2	1	2.79	1	12.18	1	6.88	2	6.8	1	9.7	1	2	0	2	2	1	0	0	0	0	0	45	45
2	1	3	2.39	1	18.97	1	1.96	1	5.5	1	16.6	1	1	0	2	2	2	1	0	1	0	0	20	20
1	1	3	1.02	1	25.46	1	2.94	1	17.1	1	11	1	2	0	3	1	2	1	0	1	0	0	20	20
2	1	1	1.42	1	9.13	1	1.48	1	0.1	1	6.1	1	1	0	2	2	1	0	0	0	1	1	76	76
2	1	3	1.36	1	149.8	2	1.8	1	168	2	17.8	1	2	0	1	1	2	1	0	0	1	1	76	76
2	1	3	1.4	1	14.45	1	0.2	1	1.83	1	26.3	1	1	0	3	1	2	2	0	0	0	0	25	25
1	2	3	4.2	1	6.07	1	1.42	1	0.01	1	7.4	1	1	0	1	2	2	1	0	1	1	1	76	76
2	1	3	2.56	1	0.6	1	1.46	1	0.01	1	10.6	1	1	0	3	2	2	1	0	1	1	1	77	77
1	1	2	2.2	1	17.49	1	1.51	1	14.72	1	6.9	1	2	0	3	2	2	0	0	0	1	1	77	77
1	2	3	3.37	1	22	1	1.27	1	19.18	1	2.2	1	1	0	3	2	1	2	0	1	0	0	24	24
2	2	2	0.77	1	8.61	1	0.88	1	0.01	1	3.8	1	1	0	3	2	2	0	0	0	0	0	24	24
2	1	2	4.6	1	15.46	1	2.68	1	12.07	1	8.8	1	1	0	3	2	2	0	0	1	0	0	24	24
2	1	3	0.98	1	13.66	1	0.74	1	0.01	1	8.1	1	1	0	2	2	2	1	0	0	1	1	77	77
2	2	3	1.6	1	10.44	1	3.29	1	0.01	1	1.7	1	1	0	2	2	1	1	0	0	1	1	77	77
1	1	2	4.48	1	6.51	1	1.24	1	1.14	1	2.6	1	1	0	2	2	2	0	0	1	1	1	77	77
1	1	3	3.13	1	12.77	1	2.99	1	5.42	1	4.2	1	1	1	1	1	1	1	0	1	1	1	77	77
2	1	1	3.3	1	0.6	1	6.05	2	0.01	1	5.8	1	1	0	3	2	1	0	0	0	1	1	77	77
1	2	2	1.65	1	13.07	1	0.87	1	4.95	1	8.6	1	1	0	1	2	2	0	0	1	1	1	77	77
2	2	3	2.85	1	21.64	1	18.96	2	22.81	2	12.58	1	1	1	1	2	2	2	0	0	0	0	15	15
1	2	3	3.42	1	8.05	1	1.19	1	0.01	1	6.4	1	1	0	3	2	2	1	0	0	0	0	59	47
2	2	1	1.99	1	26.79	1	3.71	1	18.49	1	10.6	1	1	0	1	2	1	0	0	0	1	1	78	78
2	1	1	1.26	1	9.32	1	0.75	1	0.01	1	12.9	1	1	0	1	2	1	0	0	0	1	1	78	78
1	1	3	1.55	1	6.8	1	1.3	1	0.34	1	12.8	1	1	0	3	2	2	2	0	0	0	0	28	9
2	1	3	3.18	1	0.6	1	1.68	1	0.01	1	7.7	1	1	0	3	2	2	1	0	1	1	1	78	78
1	1	2	1.44	1	24.05	1	4.81	1	17.62	1	8.6	1	2	0	3	2	2	0	0	1	1	1	78	78
2	2	3	1.87	1	16.42	1	1.14	1	15.93	1	6.8	1	1	0	3	2	2	2	0	1	0	0	36	9
1	1	4	2.67	1	8.36	1	25.95	2	5.52	1	9.7	1	2	0	3	2	2	0	1	1	0	0	18	18
1	2	4	1.93	1	14.84	1	1.61	1	0.01	1	16.2	1	1	1	3	2	2	1	1	1	0	0	21	21
1	2	3	1.28	1	14.9	1	10.02	2	6.08	1	6.5	1	1	0	1	2	2	1	0	1	0	0	21	21
2	2	1	1.3	1	5.79	1	0.59	1	0.01	1	48.5	2	1	0	3	2	1	0	0	0	1	1	78	78
2	2	3	3.65	1	3.02	1	1.25	1	0.01	1	12.9	1	1	0	3	2	2	2	0	0	1	1	79	79
2	1	2	1.42	1	6.9	1	1.61	1	0.01	1	14	1	1	0	3	2	2	0	0	0	0	0	20	20
1	2	2	2.45	1	2.93	1	0.96	1	0.01	1	24.8	1	1	0	1	2	2	0	0	1	1	1	79	79
1	2	1	4.1	1	0.6	1	1.19	1	0.01	1	11.6	1	1	0	1	2	1	0	0	0	1	1	79	79
1	2	1	1.89	1	11.23	1	1.59	1	5.22	1	18.6	1	1	0	3	2	1	0	0	0	1	1	79	79
1	1	2	1.15	1	7.63	1	1.41	1	1.08	1	8.8	1	1	0	3	2	2	0	0	1	1	1	79	79
1	2	1	0.58	1	11	1	2.15	1	0.01	1	5.9	1	2	0	3	2	1	0	0	0	1	1	79	79
1	2	3	1.64	1	4.59	1	1.09	1	0.05	1	4.6	1	1	0	3	2	1	1	0	1	1	1	79	79
2	1	3	1.82	1	4.59	1	2.99	1	0.01	1	11.5	1	1	0	3	2	1	2	0	1	0	0	60	48
1	2	1	2.43	1	7.82	1	3.37	1	0.01	1	3.6	1	1	0	2	2	1	0	0	0	1	1	77	77
1	2	2	4.29	1	8.97	1	4.68	1	0.01	1	8.2	1	1	0	3	2	2	0	0	1	1	1	79	79
1	1	2	2.59	1	5.14	1	98.76	2	0.01	1	14.4	1	2	0	3	2	2	0	0	1	1	1	79	79
2	1	2	3.02	1	7.42	1	0	1	0	1	7.2	1	2	0	3	2	2	0	0	1	1	1	79	79
1	2	2	3.61	1	11.3	1	3.41	1	3.27	1	5.4	1	1	0	3	2	2	0	0	0	1	1	79	79
2	1	1	2.41	1	15.03	1	0.82	1	9.79	1	9.8	1	1	0	3	2	1	0	0	0	1	1	79	79
1	1	2	2.81	1	4.58	1	1.7	1	0.21	1	7.3	1	1	0	3	1	2	0	0	1	0	0	36	19
1	2	1	2.45	1	15.99	1	1.7	1	8.83	1	7.5	1	2	0	3	2	1	0	0	0	1	1	79	79
1	2	1	3.59	1	26.47	1	1.76	1	9.12	1	25.3	1	2	0	1	2	1	0	0	0	0	0	17	17
2	2	1	0.99	1	3.53	1	1.43	1	0.01	1	7.68	1	1	0	3	2	1	0	0	0	1	1	80	80
1	2	3	2.92	1	5.16	1	1.89	1	0.01	1	5.7	1	1	1	3	2	2	2	0	0	1	1	80	80
1	1	3	1.44	1	20.13	1	2.25	1	14.91	1	9.1	1	2	1	3	2	2	1	0	1	1	1	80	80
1	2	2	1.56	1	3.99	1	1.64	1	0.01	1	7.2	1	1	0	1	2	2	1	0	1	0	0	33	28
1	1	3	2.53	1	37.96	2	1.49	1	25.88	2	5.6	1	1	0	3	2	2	1	0	1	1	1	80	80
1	1	3	<0.50	1	5.35	1	1.31	1	0.01	1	5.4	1	2	0	3	2	2	1	0	1	1	0	67	59
2	1	2	1.3	1	8.89	1	3.52	1	4.62	1	20.2	1	1	1	3	1	2	0	0	1	1	1	80	80
1	1	3	1.93	1	11.4	1	300	1	11.57	1	15	1	1	0	3	2	2	1	0	1	1	1	80	80
1	1	3	2.68	1	16.5	1	1.07	1	13.4	1	4.6	1	1	1	3	1	2	2	0	1	0	0	36	8
1	2	2	0.93	1	5.05	1	1.64	1	0.01	1	81.7	2	1	0	1	2	2	0	0	1	0	0	69	69
1	1	1	1.18	1	12.01	1	2.6	1	0.01	1	7.72	1	1	0	1	2	1	0	0	0	1	1	76	76
1	2	3	2.95	1	14.24	1	1.84	1	8.2	1	11.94	1	1	0	3	2	2	1	0	0	0	0	30	13
1	1	1	1.23	1	2.34	1	3.7	1	0.01	1	5.61	1	2	0	3	2	1	0	0	1	0	0	5	5
1	2	3	3.09	1	15.33	1	1.37	1	4.86	1	14.2	1	1	1	3	2	1	1	0	0	1	1	78	78
1	2	3	3.86	1	22.73	1	1.05	1	8.4	1	70.4	2	2	1	3	2	2	2	0	0	0	0	33	31
2	1	2	1.06	1	7.26	1	1.35	1	6.39	1	10.23	1	1	0	3	2	2	0	0	1	1	1	68	68
1	2	1	1.68	1	1.7	1	7.99	2	0.01	1	9.65	1	1	0	3	2	1	0	0	0	1	1	66	66
2	2	2	1.27	1	5.16	1	2.02	1	0.01	1	7.06	1	1	0	3	2	2	0	0	1	1	1	69	69
